# Supplementary material
Source: PubMed Central journal article supplement (PMC6754754)
Supplement: NIHMS1046496-supplement-Table_1S.pdf [file NIHMS1046496-supplement-Table_1S.pdf]

**Table 1S Complete Flow Cytometry Results at Diagnosis**

| <b>Flow Cytometry Results:<br/>Mean absolute values,<br/>cells/mcL</b>                                     | <b>Pediatric onset<br/>cohort (n=91)</b> | <b>Adult onset cohort<br/>(n=107)</b> |
|------------------------------------------------------------------------------------------------------------|------------------------------------------|---------------------------------------|
| Mean absolute CD3+<br>(All lymphocytes)<br>(Normal adult range 550-<br>2202)                               | 1737 (N=41)                              | 1264 (N=65)                           |
| Mean absolute CD19+<br>(B cells)<br>(Normal adult range 91-409)                                            | 254 (N=39)                               | 210 (N=66)                            |
| Mean absolute CD21-<br>(B cell subset)<br>(Normal adult range 0.3-22)                                      | 27 (N=5)                                 | 18 (N=49)                             |
| Mean absolute switched<br>memory B cells CD27+IgM-<br>IgD-<br>(B cell subset)<br>(Normal adult range 7-61) | 3 (N=4)                                  | 9 (N=46)                              |
| Mean absolute CD4+<br>(T helper cells)<br>(Normal adult range 365-<br>1437)                                | 394 (N=42)                               | 796 (N=65)                            |
| Mean absolute CD8+<br>(Cytotoxic T cells)<br>(Normal adult range 199-846)                                  | 733 (N=41)                               | 440 (N=65)                            |
| Mean absolute CD16+<br>(Natural killer cells)<br>(Normal adult range 59-513)                               | 143 (N=36)                               | 151 (N=22)                            |

Note: Due to incomplete data sets for all laboratory parameters the number of patients with data is represented in parenthesis as above.

**Table 2S Laboratory values at most recent clinic visit or hospitalization**

| <b>Mean immunoglobulin levels in mg/dL (range)</b> | <b>Pediatric onset cohort (n=91)</b> | <b>Adult onset cohort (n=107)</b> |
|----------------------------------------------------|--------------------------------------|-----------------------------------|
| IgG<br>(Normal adult range 588 - 1573)             | 849 (47-1830)                        | 914 (11-1900)                     |
| IgA<br>(Normal adult range 46 - 287)               | 9 (0-150)                            | 26 (0-319)                        |
| IgM<br>(Normal adult range 57 - 237)               | 42 (0-631)                           | 56 (0-653)                        |

Fig S1



**Fig 2S**

**a**

Features of lung disease



**b**

Association of individual lung features with deceased status
